# Supplementary material
Source: PubMed Central journal article supplement (PMC2698349)
Supplement: supp_75_12_3851__1.pdf [file supp_75_12_3851__1.pdf]

**Table S1. Enzymatic activities in starved and mucus-treated cultures**

| Enzyme                                 | Strain                      |                                |                    | Strain                   |                        |                       | Strain                          |                       |                        | Strain                          |                     |                     |
|----------------------------------------|-----------------------------|--------------------------------|--------------------|--------------------------|------------------------|-----------------------|---------------------------------|-----------------------|------------------------|---------------------------------|---------------------|---------------------|
|                                        | <i>S. marcescens</i> PDL100 |                                |                    | <i>S. marcescens</i> MG1 |                        |                       | <i>S. marcescens</i> ATCC 39006 |                       |                        | <i>S. marcescens</i> ATCC 43422 |                     |                     |
|                                        | Starved                     | 2 hr Mucus                     | 18 hr Mucus        | Starved                  | 2 hr Mucus             | 18 hr Mucus           | Starved                         | 2 hr Mucus            | 18 hr Mucus            | Starved                         | 2 hr Mucus          | 18 hr Mucus         |
| $\alpha$ -D-Galactopyranosidase        | 1.09 ± 0.03                 | <b>0.37 ± 0.40<sup>a</sup></b> | 1.99 ± 1.05        | 0.123 ± 0.01             | <b>78.81 ± 22.51</b>   | <b>8.21 ± 3.76</b>    | 120.13 ± 27.50                  | <b>591.53 ± 62.78</b> | <b>1933.42 ± 424.7</b> | 0.70 ± 0.05                     | <b>5.55 ± 0.55</b>  | 0.45 ± 0.24         |
| $\beta$ -D-Galactopyranosidase         | 14.95 ± 0.15                | 18.10 ± 1.45                   | 18.16 ± 2.95       | 2.00 ± 0.10              | <b>63.98 ± 13.43</b>   | <b>23.56 ± 9.39</b>   | 53.55 ± 4.73                    | <b>191.30 ± 32.05</b> | <b>638.44 ± 151.13</b> | 8.56 ± 0.44                     | 7.96 ± 1.21         | <b>23.14 ± 7.77</b> |
| $\alpha$ -D-Glucopyranosidase          | 214.43 ± 0.95               | 230.47 ± 16.71                 | 175.01 ± 24.79     | 38.53 ± 1.57             | <b>119.80 ± 32.44</b>  | <b>148.41 ± 53.77</b> | 9.93 ± 0.16                     | <b>30.71 ± 5.90</b>   | <b>122.16 ± 20.23</b>  | 164.61 ± 9.88                   | 123.09 ± 6.19       | 88.85 ± 7.96        |
| $\beta$ -D-Glucopyranosidase           | 1.41 ± 0.06                 | <b>0.18 ± 1.07</b>             | 1.52 ± 0.39        | 0.27 ± 0.02              | <b>76.48 ± 15.60</b>   | <b>8.14 ± 3.73</b>    | 293.93 ± 8.39                   | <b>732.64 ± 86.99</b> | <b>2694.80 ± 449.9</b> | 3.11 ± 0.34                     | 3.09 ± 0.25         | 5.04 ± 0.93         |
| $\alpha$ -D-Xylopyranosidase           | 1.36 ± 0.09                 | <b>0.15 ± 0.10</b>             | <b>0.41 ± 0.09</b> | 0.04 ± 0.017             | <b>29.53 ± 6.09</b>    | <b>0.64 ± 0.59</b>    | 1.51 ± 0.06                     | <b>22.95 ± 3.57</b>   | <b>13.46 ± 2.62</b>    | 0.59 ± 0.01                     | <b>1.93 ± 0.04</b>  | 0.256 ± 0.05        |
| $\beta$ -D-Xylopyranosidase            | 0.90 ± 0.18                 | 1.69 ± 0.44                    | 0.50 ± 0.45        | 0.02 ± 0.04              | <b>161.14 ± 35.811</b> | <b>16.4 ± 9.5</b>     | 26.01 ± 6.83                    | <b>70.73 ± 12.61</b>  | <b>272.77 ± 92.21</b>  | 1.80 ± 0.36                     | <b>13.12 ± 1.23</b> | 0.85 ± 0.21         |
| $\alpha$ -L-Arabinopyranosidase        | 17.73 ± 0.04                | 19.90 ± 1.56                   | 15.81 ± 2.24       | 2.517 ± 0.11             | <b>31.04 ± 10.32</b>   | <b>13.04 ± 4.87</b>   | 28.96 ± 4.14                    | <b>98.41 ± 19.05</b>  | <b>316.59 ± 73.32</b>  | 10.65 ± 0.43                    | 8.34 ± 0.57         | 5.43 ± 0.46         |
| $\beta$ -L-Arabinopyranosidase         | 1.21 ± 0.14                 | <b>0.11 ± 0.14</b>             | <b>0.48 ± 0.13</b> | 0.01 ± 0.00              | <b>30.46 ± 4.80</b>    | <b>0.56 ± 0.45</b>    | 1.59 ± 0.05                     | <b>24.14 ± 3.72</b>   | <b>20.36 ± 3.21</b>    | 0.76 ± 0.03                     | 1.93 ± 0.31         | 0.60 ± 0.01         |
| $\alpha$ -L-Fucopyranosidase           | 0.90 ± 0.02                 | <b>9.14 ± 1.70<sup>b</sup></b> | <b>9.88 ± 0.25</b> | 0.05 ± 0.00              | <b>294.59 ± 61.72</b>  | <b>11.10 ± 0.14</b>   | 0.80 ± 0.02                     | <b>1.87 ± 3.09</b>    | <b>1.50 ± 1.10</b>     | 0.69 ± 0.07                     | <b>26.26 ± 0.64</b> | <b>11.18 ± 0.48</b> |
| $\beta$ -D-Fucopyranosidase            | 1.16 ± 0.04                 | <b>0.26 ± 0.39</b>             | 0.75 ± 0.24        | 0.10 ± 0.02              | <b>45.08 ± 9.21</b>    | <b>1.31 ± 0.86</b>    | 8.24 ± 1.07                     | <b>40.26 ± 7.09</b>   | <b>92.81 ± 20.66</b>   | 1.08 ± 0.02                     | <b>2.54 ± 0.09</b>  | 1.40 ± 0.50         |
| N-Acetyl- $\beta$ -D-Galactosaminidase | 215.67 ± 2.27               | 228.62 ± 15.49                 | 168.81 ± 24.17     | 39.67 ± 1.62             | <b>168.28 ± 41.95</b>  | <b>140.88 ± 53.62</b> | 2.99 ± 0.13                     | <b>34.19 ± 4.73</b>   | <b>96.21 ± 32.12</b>   | 112.13 ± 3.99                   | 87.12 ± 3.07        | 70.72 ± 2.06        |
| $\beta$ -D-Glucuronidase               | 0.71 ± 0.14                 | 0.33 ± 0.13                    | 0.36 ± 0.16        | 0.01 ± 0.00              | <b>25.56 ± 5.57</b>    | <b>0.51 ± 0.63</b>    | 1.38 ± 0.04                     | <b>26.89 ± 3.06</b>   | <b>17.99 ± 2.85</b>    | 0.73 ± 0.01                     | 1.36 ± 0.02         | <b>0.17 ± 0.05</b>  |

  

| Enzyme                                 | Strain                     |                     |                     | Strain                    |                     |                      | Strain                    |                     |                     | Strain                     |                      |                     |
|----------------------------------------|----------------------------|---------------------|---------------------|---------------------------|---------------------|----------------------|---------------------------|---------------------|---------------------|----------------------------|----------------------|---------------------|
|                                        | <i>S. marcescens</i> 43820 |                     |                     | <i>S. marcescens</i> EL31 |                     |                      | <i>S. marcescens</i> EL34 |                     |                     | <i>S. marcescens</i> EL139 |                      |                     |
|                                        | Starved                    | 2 hr Mucus          | 18 hr Mucus         | Starved                   | 2 hr Mucus          | 18 hr Mucus          | Starved                   | 2 hr Mucus          | 18 hr Mucus         | Starved                    | 2 hr Mucus           | 18 hr Mucus         |
| $\alpha$ -D-Galactopyranosidase        | 0.50 ± 0.02                | <b>6.03 ± 0.57</b>  | 0.39 ± 0.14         | 1.03 ± 0.03               | <b>3.35 ± 4.40</b>  | <b>19.83 ± 0.48</b>  | 1.98 ± 0.10               | <b>4.13 ± 0.36</b>  | <b>8.81 ± 0.84</b>  | 1.12 ± 0.26                | <b>4.57 ± 0.25</b>   | <b>3.247 ± 0.86</b> |
| $\beta$ -D-Galactopyranosidase         | 7.24 ± 0.44                | <b>16.39 ± 3.72</b> | <b>17.77 ± 0.92</b> | 6.78 ± 0.31               | <b>3.17 ± 0.09</b>  | <b>30.51 ± 1.47</b>  | 12.87 ± 0.39              | <b>2.78 ± 0.41</b>  | <b>12.44 ± 1.31</b> | 11.22 ± 0.31               | 6.43 ± 0.23          | 11.75 ± 1.17        |
| $\alpha$ -D-Glucopyranosidase          | 120.83 ± 2.00              | 75.01 ± 10.79       | 83.61 ± 3.76        | 96.50 ± 3.20              | 90.43 ± 0.84        | 119.66 ± 4.07        | 106.97 ± 0.54             | <b>53.82 ± 0.97</b> | 59.31 ± 2.07        | 161.53 ± 3.46              | <b>107.28 ± 3.26</b> | 62.32 ± 9.63        |
| $\beta$ -D-Glucopyranosidase           | 2.27 ± 0.25                | 2.54 ± 0.01         | <b>7.95 ± 0.19</b>  | 1.19 ± 0.04               | <b>3.62 ± 0.20</b>  | <b>3.89 ± 0.30</b>   | 3.33 ± 0.14               | 5.21 ± 0.02         | 2.09 ± 0.30         | 1.99 ± 0.15                | <b>4.46 ± 0.08</b>   | <b>5.46 ± 1.65</b>  |
| $\alpha$ -D-Xylopyranosidase           | 0.90 ± 0.43                | <b>2.00 ± 0.05</b>  | 0.55 ± 0.02         | 1.05 ± 0.26               | 1.33 ± 0.26         | 0.70 ± 0.00          | 0.80 ± 0.01               | 1.78 ± 0.07         | 0.58 ± 0.01         | 1.22 ± 0.03                | 1.35 ± 0.02          | 0.81 ± 0.01         |
| $\beta$ -D-Xylopyranosidase            | 1.46 ± 0.14                | <b>12.15 ± 1.25</b> | 2.64 ± 0.27         | 0.78 ± 0.13               | <b>14.00 ± 1.30</b> | <b>3.25 ± 0.36</b>   | 0.73 ± 0.02               | <b>13.78 ± 1.30</b> | <b>2.97 ± 0.33</b>  | 0.87 ± 0.03                | <b>13.44 ± 1.17</b>  | <b>3.08 ± 0.34</b>  |
| $\alpha$ -L-Arabinopyranosidase        | 9.83 ± 0.43                | 7.17 ± 1.67         | 7.84 ± 0.58         | 10.15 ± 0.57              | 10.01 ± 0.76        | 11.15 ± 0.42         | 9.23 ± 0.10               | <b>1.69 ± 0.55</b>  | <b>1.82 ± 0.23</b>  | 16.69 ± 0.50               | 14.04 ± 1.12         | 9.16 ± 0.47         |
| $\beta$ -L-Arabinopyranosidase         | 0.52 ± 0.01                | <b>1.95 ± 0.30</b>  | 0.52 ± 0.05         | 0.79 ± 0.11               | 1.03 ± 0.31         | <b>0.07 ± 0.03</b>   | 0.35 ± 0.00               | <b>2.10 ± 0.31</b>  | 0.21 ± 0.01         | 0.83 ± 0.01                | <b>1.80 ± 0.32</b>   | 0.56 ± 0.02         |
| $\alpha$ -L-Fucopyranosidase           | 0.466 ± 0.03               | <b>26.42 ± 0.65</b> | <b>10.72 ± 0.53</b> | 7.29 ± 0.72               | <b>19.63 ± 0.54</b> | <b>11.38 ± 0.58</b>  | 0.29 ± 0.00               | <b>26.52 ± 0.66</b> | <b>11.23 ± 0.55</b> | 0.83 ± 0.19                | <b>26.20 ± 0.65</b>  | <b>11.15 ± 0.56</b> |
| $\beta$ -D-Fucopyranosidase            | 0.90 ± 0.14                | <b>2.40 ± 0.06</b>  | 0.10 ± 0.03         | 1.280 ± 0.21              | 1.80 ± 0.10         | 2.26 ± 0.12          | 1.92 ± 0.12               | 2.76 ± 0.10         | 1.48 ± 0.09         | 1.58 ± 0.07                | 2.29 ± 0.09          | 1.13 ± 0.12         |
| N-Acetyl- $\beta$ -D-Galactosaminidase | 125.49 ± 5.63              | 84.38 ± 2.11        | 161.46 ± 2.78       | 90.11 ± 5.15              | 74.36 ± 1.45        | <b>134.62 ± 3.14</b> | 108.20 ± 0.71             | 68.13 ± 0.02        | 89.55 ± 4.71        | 116.36 ± 1.83              | <b>80.35 ± 1.26</b>  | <b>48.70 ± 3.62</b> |
| $\beta$ -D-Glucuronidase               | 0.55 ± 0.05                | <b>1.62 ± 0.06</b>  | 0.13 ± 0.04         | 0.73 ± 0.04               | 1.31 ± 0.04         | <b>0.03 ± 0.04</b>   | 0.49 ± 0.01               | 1.43 ± 0.02         | <b>0.03 ± 0.01</b>  | 1.08 ± 0.01                | 1.14 ± 0.06          | <b>0.48 ± 0.01</b>  |

  

| Enzyme                                 | Strain                     |                     |                     | Strain                     |                     |                     | Strain                     |                     |                    | Strain                     |                     |                     |
|----------------------------------------|----------------------------|---------------------|---------------------|----------------------------|---------------------|---------------------|----------------------------|---------------------|--------------------|----------------------------|---------------------|---------------------|
|                                        | <i>S. marcescens</i> EL202 |                     |                     | <i>S. marcescens</i> EL206 |                     |                     | <i>S. marcescens</i> EL266 |                     |                    | <i>S. marcescens</i> EL368 |                     |                     |
|                                        | Starved                    | 2 hr Mucus          | 18 hr Mucus         | Starved                    | 2 hr Mucus          | 18 hr Mucus         | Starved                    | 2 hr Mucus          | 18 hr Mucus        | Starved                    | 2 hr Mucus          | 18 hr Mucus         |
| $\alpha$ -D-Galactopyranosidase        | 0.54 ± 0.03                | <b>2.06 ± 0.48</b>  | <b>3.40 ± 0.46</b>  | 0.62 ± 0.05                | <b>2.01 ± 0.50</b>  | <b>2.45 ± 0.02</b>  | 0.68 ± 0.01                | 0.83 ± 0.36         | 1.21 ± 0.69        | 0.53 ± 0.02                | <b>1.62 ± 0.44</b>  | <b>0.12 ± 0.02</b>  |
| $\beta$ -D-Galactopyranosidase         | 9.83 ± 0.68                | 6.80 ± 0.14         | 17.72 ± 1.07        | 1.06 ± 0.12                | 1.99 ± 0.02         | <b>4.64 ± 0.24</b>  | 0.34 ± 0.60                | <b>0.10 ± 0.31</b>  | 0.28 ± 0.12        | 8.75 ± 0.48                | <b>2.96 ± 0.06</b>  | <b>10.44 ± 0.20</b> |
| $\alpha$ -D-Glucopyranosidase          | 102.30 ± 6.60              | 57.79 ± 3.10        | <b>27.65 ± 1.25</b> | 1.21 ± 0.24                | <b>13.42 ± 0.42</b> | <b>3.53 ± 0.16</b>  | 0.42 ± 0.03                | <b>11.42 ± 0.23</b> | <b>5.31 ± 0.02</b> | 119.46 ± 2.89              | 83.66 ± 0.18        | 130.12 ± 2.56       |
| $\beta$ -D-Glucopyranosidase           | 1.07 ± 0.09                | <b>3.01 ± 0.20</b>  | <b>2.21 ± 0.11</b>  | 2.15 ± 0.26                | 2.77 ± 0.19         | 3.11 ± 0.04         | 0.42 ± 0.01                | <b>2.87 ± 0.02</b>  | <b>0.37 ± 0.17</b> | 2.89 ± 0.41                | 1.48 ± 0.34         | 5.75 ± 1.26         |
| $\alpha$ -D-Xylopyranosidase           | 0.75 ± 0.08                | 1.57 ± 0.08         | 0.94 ± 0.00         | 0.44 ± 0.03                | <b>1.65 ± 0.08</b>  | <b>0.42 ± 0.00</b>  | 0.27 ± 0.00                | <b>1.55 ± 0.01</b>  | <b>0.00 ± 0.02</b> | 1.26 ± 0.04                | <b>0.91 ± 0.29</b>  | 1.13 ± 0.03         |
| $\beta$ -D-Xylopyranosidase            | 0.98 ± 0.080               | <b>13.30 ± 1.28</b> | <b>2.24 ± 0.23</b>  | 0.68 ± 0.04                | <b>13.87 ± 1.30</b> | <b>3.50 ± 0.37</b>  | 0.21 ± 0.01                | <b>13.79 ± 1.26</b> | <b>3.69 ± 0.30</b> | 0.93 ± 0.06                | <b>12.24 ± 0.41</b> | <b>2.14 ± 0.30</b>  |
| $\alpha$ -L-Arabinopyranosidase        | 13.59 ± 2.35               | 10.41 ± 0.21        | 10.84 ± 1.03        | 0.48 ± 0.00                | <b>2.10 ± 0.25</b>  | <b>1.24 ± 0.20</b>  | 0.20 ± 0.01                | <b>1.70 ± 0.26</b>  | <b>0.01 ± 0.04</b> | 11.06 ± 0.47               | 6.87 ± 1.58         | 10.28 ± 1.36        |
| $\beta$ -L-Arabinopyranosidase         | 0.55 ± 0.02                | <b>1.91 ± 0.32</b>  | 0.65 ± 0.02         | 0.96 ± 0.21                | <b>2.00 ± 0.21</b>  | <b>0.09 ± 0.03</b>  | 0.21 ± 0.01                | <b>2.10 ± 0.28</b>  | 0.29 ± 0.00        | 0.71 ± 0.03                | <b>1.98 ± 0.34</b>  | 0.37 ± 0.03         |
| $\alpha$ -L-Fucopyranosidase           | 0.53 ± 0.04                | <b>26.16 ± 0.63</b> | <b>9.78 ± 0.32</b>  | 0.80 ± 0.24                | <b>26.06 ± 0.66</b> | <b>11.13 ± 0.57</b> | 0.13 ± 0.01                | <b>26.09 ± 0.65</b> | <b>2.31 ± 0.31</b> | 1.50 ± 0.38                | <b>17.45 ± 0.50</b> | 0.98 ± 0.26         |
| $\beta$ -D-Fucopyranosidase            | 1.09 ± 0.11                | 2.45 ± 0.13         | 1.35 ± 0.11         | 0.58 ± 0.00                | <b>3.14 ± 0.11</b>  | <b>0.08 ± 0.02</b>  | 0.22 ± 0.01                | <b>3.02 ± 0.08</b>  | 0.37 ± 0.03        | 0.95 ± 0.03                | <b>2.65 ± 0.13</b>  | 0.74 ± 0.01         |
| N-Acetyl- $\beta$ -D-Galactosaminidase | 118.02 ± 8.31              | 108.06 ± 0.08       | 161.25 ± 3.46       | 0.82 ± 0.07                | <b>17.57 ± 0.73</b> | <b>9.62 ± 0.59</b>  | 1.15 ± 0.20                | <b>8.50 ± 0.00</b>  | <b>7.14 ± 0.14</b> | 122.04 ± 4.89              | 89.75 ± 1.29        | 128.19 ± 0.94       |
| $\beta$ -D-Glucuronidase               | 0.77 ± 0.69                | 1.17 ± 0.07         | 0.57 ± 0.01         | 1.03 ± 0.40                | 1.50 ± 0.06         | <b>0.02 ± 0.03</b>  | 0.13 ± 0.02                | <b>1.46 ± 0.02</b>  | <b>0.39 ± 0.01</b> | 1.33 ± 0.19                | 0.99 ± 0.07         | 0.59 ± 0.03         |

  

| Enzyme                          | Strain                     |                      |                     | Strain                         |                     |                      | Strain                    |                        |                      | Strain                      |                     |                     |
|---------------------------------|----------------------------|----------------------|---------------------|--------------------------------|---------------------|----------------------|---------------------------|------------------------|----------------------|-----------------------------|---------------------|---------------------|
|                                 | <i>S. marcescens</i> EL402 |                      |                     | <i>P. mandapamensis</i> 33-C12 |                     |                      | <i>H. meridiana</i> 33-E7 |                        |                      | <i>P. leiognathi</i> 33-G12 |                     |                     |
|                                 | Starved                    | 2 hr Mucus           | 18 hr Mucus         | Starved                        | 2 hr Mucus          | 18 hr Mucus          | Starved                   | 2 hr Mucus             | 18 hr Mucus          | Starved                     | 2 hr Mucus          | 18 hr Mucus         |
| $\alpha$ -D-Galactopyranosidase | 0.96 ± 0.07                | <b>3.96 ± 0.12</b>   | 0.78 ± 0.07         | 1.98 ± 0.16                    | 2.63 ± 0.26         | <b>6.75 ± 1.84</b>   | 1.51 ± 0.15               | <b>3.33 ± 0.56</b>     | <b>8.87 ± 3.00</b>   | 5.41 ± 0.73                 | <b>18.64 ± 4.38</b> | <b>44.58 ± 5.23</b> |
| $\beta$ -D-Galactopyranosidase  | 16.32 ± 2.76               | <b>6.36 ± 0.92</b>   | 10.21 ± 1.28        | 2.22 ± 0.02                    | <b>8.86 ± 1.42</b>  | <b>21.94 ± 4.46</b>  | 1.78 ± 0.16               | <b>26.15 ± 3.97</b>    | <b>64.93 ± 19.88</b> | 3.59 ± 0.17                 | <b>0.34 ± 0.77</b>  | <b>25.25 ± 5.65</b> |
| $\alpha$ -D-Glucopyranosidase   | 145.15 ± 16.6              | <b>109.66 ± 7.37</b> | 120.37 ± 18.26      | 1.70 ± 0.01                    | <b>11.44 ± 2.02</b> | <b>26.67 ± 6.89</b>  | 163.49 ± 19.50            | 199.29 ± 7.95          | 188.00 ± 14.42       | 3.95 ± 0.53                 | <b>13.47 ± 0.03</b> | 2.51 ± 0.09         |
| $\beta$ -D-Glucopyranosidase    | 3.13 ± 0.54                | <b>0.45 ± 0.59</b>   | <b>10.22 ± 1.29</b> | 12.49 ± 0.06                   | 9.81 ± 0.76         | <b>61.43 ± 19.09</b> | 12.39 ± 1.07              | 14.08 ± 0.60           | <b>35.83 ± 3.54</b>  | 3.72 ± 0.19                 | 2.91 ± 0.51         | <b>11.13 ± 0.45</b> |
| $\alpha$ -D-Xylopyranosidase    | 2.04 ± 0.11                | <b>0.71 ± 0.09</b>   | <b>0.74 ± 0.06</b>  | 1.42 ± 0.00                    | 1.07 ± 0.01         | 2.49 ± 0.32          | 1.38 ± 0.16               | 0.91 ± 0.10            | 2.01 ± 0.34          | 1.15 ± 0.23                 | 2.24 ± 0.02         | 2.54 ± 0.01         |
| $\beta$ -D-Xylopyranosidase     | 2.06 ± 0.03                | <b>12.06 ± 1.17</b>  | 1.22 ± 0.24         | 4.92 ± 0.45                    | 3.49 ± 0.89         | <b>19.49 ± 1.21</b>  | 10.68 ± 0.88              | <b>1.48 ± 0.80</b>     | <b>0.97 ± 0.13</b>   | 1.00 ± 0.05                 | <b>14.24 ± 1.26</b> | 1.47 ± 0.26         |
| $\alpha$ -L-Arabinopyranosidase | 25.80 ± 5.27               | 18.68 ± 1.47         | 11.36 ± 2.02        | 1.47 ± 0.05                    | 1.20 ± 0.22         | 2.31 ± 0.30          | 1.34 ± 0.10               | 1.02 ± 0.22            | <b>3.51 ± 0.56</b>   | 1.47 ± 0.10                 | 2.39 ± 0.19         | <b>4.86 ± 0.23</b>  |
| $\beta$ -L-Arabinopyranosidase  | 1.49 ± 0.45                | 1.64 ± 0.25          | <b>0.60 ± 0.09</b>  | 1.77 ± 0.01                    | 1.02 ± 0.23         | 2.60 ± 0.14          | 1.52 ± 0.14               | 0.89 ± 0.24            | 2.98 ± 0.14          | 1.98 ± 0.16                 | 2.06 ± 0.22         | <b>6.90 ± 0.00</b>  |
| $\alpha$ -L-Fucopyranosidase    | 2.45 ± 0.27                | <b>15.04 ± 0.12</b>  | <b>2.95 ± 0.33</b>  | 1.53 ± 0.01                    | <b>25.48 ± 0.59</b> | <b>7.90 ± 0.01</b>   | 1.28 ± 0.25               | <b>25.73 ± 0.60</b> </ |                      |                             |                     |                     |
