# Supplementary material
Source: PubMed Central journal article supplement (PMC2698349)
Supplement: supp_75_12_3851__2.pdf [file supp_75_12_3851__2.pdf]

Table S2. Utilization of nutrients from Biolog Ecoplates by isolates of *Serratia marcescens* and coral associated bacteria

|                               | S.                | P.                  | H.               | P.                |
|-------------------------------|-------------------|-------------------|-------------------|-------------------|-------------------|-------------------|-------------------|-------------------|-------------------|-------------------|-------------------|-------------------|---------------------|------------------|-------------------|
|                               | <i>marcescens</i> | <i>manapamensis</i> | <i>meridiana</i> | <i>leiognathi</i> |
|                               | PDL100            | MG1               | 39006             | 43422             | 43820             | EL31              | EL34              | EL139             | EL202             | EL206             | EL368             | EL402             | 33C12               | 33E7             | 33G12             |
| <b>Carbon Source</b>          |                   |                   |                   |                   |                   |                   |                   |                   |                   |                   |                   |                   |                     |                  |                   |
| Water Control                 | - <sup>a</sup>    | -                 | -                 | -                 | -                 | -                 | -                 | -                 | -                 | -                 | -                 | -                 | -                   | -                | -                 |
| <b>Polymers</b>               |                   |                   |                   |                   |                   |                   |                   |                   |                   |                   |                   |                   |                     |                  |                   |
| α-cyclodextrin                | -                 | +                 | -                 | +                 | +                 | +                 | -                 | +                 | -                 | -                 | +                 | +                 | -                   | +                | -                 |
| Glycogen                      | -                 | +                 | -                 | +                 | +                 | +                 | -                 | +                 | -                 | -                 | +                 | -                 | +                   | +                | +                 |
| Tween 40                      | +                 | +                 | -                 | +                 | +                 | +                 | +                 | +                 | +                 | +                 | +                 | +                 | +                   | +                | +                 |
| Tween 80                      | +                 | +                 | +                 | +                 | +                 | +                 | +                 | +                 | +                 | +                 | +                 | +                 | +                   | +                | +                 |
| <b>Carbohydrates</b>          |                   |                   |                   |                   |                   |                   |                   |                   |                   |                   |                   |                   |                     |                  |                   |
| D-cellobiose                  | -                 | +                 | +                 | +                 | -                 | -                 | -                 | -                 | +                 | -                 | +                 | +                 | +                   | +                | +                 |
| D-erythritol                  | -                 | +                 | -                 | +                 | +                 | +                 | +                 | +                 | +                 | -                 | +                 | +                 | +                   | +                | +                 |
| D-galactonic acid γ-lactone   | -                 | -                 | -                 | +                 | +                 | +                 | +                 | +                 | +                 | +                 | +                 | +                 | +                   | +                | +                 |
| <b>N-acetyl-D-glucosamine</b> | +                 | +                 | +                 | +                 | +                 | +                 | +                 | +                 | +                 | +                 | +                 | +                 | +                   | +                | +                 |
| <b>Glucose-1-phosphate</b>    | +                 | +                 | +                 | +                 | +                 | +                 | +                 | +                 | +                 | +                 | +                 | +                 | +                   | +                | +                 |
| β-methyl-D-glucoside          | +                 | +                 | +                 | +                 | +                 | +                 | +                 | +                 | +                 | +                 | +                 | +                 | +                   | +                | +                 |
| D,L-α-glycerol phosphate      | +                 | +                 | +                 | +                 | +                 | +                 | +                 | +                 | +                 | +                 | +                 | +                 | +                   | +                | +                 |
| α-D-lactose                   | -                 | -                 | -                 | -                 | -                 | -                 | -                 | -                 | -                 | -                 | -                 | -                 | -                   | -                | -                 |
| D-mannitol                    | +                 | +                 | +                 | +                 | +                 | +                 | +                 | +                 | +                 | +                 | +                 | +                 | +                   | +                | +                 |
| D-xylose                      | +                 | +                 | -                 | +                 | +                 | +                 | +                 | +                 | +                 | +                 | +                 | +                 | +                   | +                | +                 |
| <b>Carboxylic acids</b>       |                   |                   |                   |                   |                   |                   |                   |                   |                   |                   |                   |                   |                     |                  |                   |
| γ-hydroxybutyric acid         | -                 | +                 | -                 | +                 | +                 | +                 | +                 | +                 | -                 | -                 | +                 | +                 | -                   | +                | -                 |
| α-ketobutyric acid            | -                 | +                 | -                 | +                 | +                 | +                 | +                 | +                 | +                 | -                 | +                 | +                 | -                   | +                | -                 |
| D-galacturonic acid           | +                 | +                 | +                 | +                 | +                 | +                 | +                 | +                 | +                 | +                 | +                 | +                 | -                   | +                | -                 |
| D-glucosaminic acid           | -                 | +                 | -                 | +                 | +                 | +                 | +                 | +                 | +                 | +                 | +                 | +                 | -                   | +                | -                 |
| Itaconic acid                 | -                 | -                 | -                 | -                 | -                 | +                 | +                 | +                 | -                 | -                 | -                 | -                 | -                   | +                | -                 |
| D-malic acid                  | -                 | -                 | +                 | +                 | +                 | +                 | +                 | +                 | +                 | +                 | +                 | +                 | +                   | +                | +                 |
| Pyruvic acid methyl ester     | +                 | +                 | +                 | +                 | +                 | +                 | +                 | +                 | +                 | +                 | +                 | +                 | +                   | +                | +                 |
| <b>Amino acids</b>            |                   |                   |                   |                   |                   |                   |                   |                   |                   |                   |                   |                   |                     |                  |                   |
| L-arginine                    | -                 | +                 | -                 | +                 | +                 | +                 | -                 | +                 | -                 | +                 | +                 | +                 | -                   | +                | -                 |
| <b>L-asparagine</b>           | +                 | +                 | +                 | +                 | +                 | +                 | +                 | +                 | +                 | +                 | +                 | +                 | +                   | +                | +                 |
| <b>Glycyl-L-glutamic acid</b> | +                 | +                 | -                 | +                 | +                 | +                 | +                 | +                 | +                 | +                 | +                 | +                 | +                   | +                | +                 |
| L-phenylalanine               | +                 | +                 | -                 | +                 | +                 | +                 | +                 | +                 | +                 | +                 | +                 | +                 | +                   | +                | +                 |
| <b>L-serine</b>               | +                 | +                 | -                 | +                 | +                 | +                 | +                 | +                 | +                 | +                 | +                 | +                 | +                   | +                | +                 |
| <b>L-threonine</b>            | +                 | +                 | -                 | +                 | +                 | +                 | +                 | +                 | +                 | +                 | +                 | +                 | +                   | +                | +                 |
| <b>Amines</b>                 |                   |                   |                   |                   |                   |                   |                   |                   |                   |                   |                   |                   |                     |                  |                   |
| Phenylethylamine              | -                 | +                 | -                 | +                 | +                 | -                 | -                 | -                 | -                 | -                 | +                 | +                 | -                   | +                | -                 |
| Putrescine                    | -                 | +                 | -                 | +                 | +                 | +                 | -                 | +                 | -                 | -                 | +                 | +                 | -                   | +                | -                 |
| <b>Phenolic compounds</b>     |                   |                   |                   |                   |                   |                   |                   |                   |                   |                   |                   |                   |                     |                  |                   |
| 2-hydroxy benzoic acid        | -                 | -                 | -                 | -                 | -                 | -                 | -                 | -                 | -                 | -                 | -                 | -                 | -                   | -                | -                 |
| 4-hydroxy benzoic acid        | -                 | -                 | -                 | -                 | -                 | -                 | -                 | -                 | -                 | -                 | -                 | -                 | -                   | -                | -                 |

<sup>a</sup> the substrate was not utilized as indicated by the lack of the purple color in the well  
<sup>b</sup> the substrate was utilized as indicated by the appearance of the purple color in the well
